# Supplementary material for: Indirect protein quantification of drug-transforming enzymes using peptide group-specific immunoaffinity enrichment and mass spectrometry
Source: PubMed Central journal article supplement (PMC4348618; doi:10.1038/srep08759), 2015-03-04
Supplement: srep08759-s1.pdf [file srep08759-s1.pdf]

## Supplemental Material

### Indirect protein quantification of drug-transforming enzymes using peptide group-specific immunoaffinity enrichment and mass spectrometry

Frederik Weiß<sup>1</sup>, Anke Schnabel<sup>2\*</sup>, Hannes Planatscher<sup>1</sup>, Bart H. J. van den Berg<sup>1</sup>, Bettina Serschnitzki<sup>2</sup>, Andreas K. Nuessler<sup>3</sup>, Wolfgang E. Thasler<sup>4</sup>, Thomas S. Weiss<sup>5</sup>, Matthias Reuss<sup>6</sup>, Dieter Stoll<sup>7</sup>, Markus F. Templin<sup>1</sup>, Thomas O. Joos<sup>1</sup>, Katrin Marcus<sup>2,#</sup>, Oliver Poetz<sup>1#</sup>

<sup>1</sup> NMI Natural and Medical Sciences Institute at the University of Tübingen, Markwiesenstr. 55, Reutlingen, Germany

<sup>2</sup> Department Functional Proteomics, Ruhr-Universität Bochum, Bochum, Germany

<sup>3</sup> Department of Traumatology, Eberhard Karls Universität Tübingen, Tuebingen, Germany

<sup>4</sup> Department of Surgery, Ludwig-Maximilians-University, Munich, Germany

<sup>5</sup> Department of Surgery, University of Regensburg, Regensburg, Germany

<sup>6</sup> Center Systems Biology, University of Stuttgart, Stuttgart, Germany

<sup>7</sup> University of Applied Sciences, Albstadt Sigmaringen, Germany

\*present address: Protagen Protein Services GmbH, Otto-Hahn-Str. 15, 44227 Dortmund, Germany

#K.M. & O.P contributed equally

Corresponding author:

Dr. Oliver Poetz, NMI Natural and Medical Sciences Institute at the University of Tübingen, Markwiesenstr. 55, 72770 Reutlingen, Germany

E-mail: poetz@nmi.de

Phone: +49 7121 51530-802

Fax: +49 7121 51530-16

**Supplemental Figure 1** Comparison of signals of endogenous cytochrome P450 (a) 3A5, (b) 3A7, and (c) MDR-1 peptide and synthetic standard. Ten  $\mu\text{g}$  hepatocyte protein extract was digested and spiked with 100 fmol synthetic standard. The samples were either analyzed by TXP-SRM or LC-SRM workflow. Ion chromatograms of the respective peptide fragments are shown.

**Supplemental Figure 2** Comparison of signals of endogenous cytochrome P450 (a) 3A4/43, (b) 3A5, (c) 3A7, and (d) MDR-1 peptide and synthetic standard. One, five, ten or 25  $\mu\text{g}$  hepatocyte protein extract was digested and spiked with 100 fmol synthetic standard. The samples were analyzed by TXP-SRM workflow. Integrated signals of the peptide fragments are plotted against the applied amount of protein extract.

**Supplemental Figure 3.** Binding capacity of the TXP antibody anti-LPNK. Synthetic non-labeled peptide standards of the cytochrome P450 (a) 3A5, (b) 3A7, and (c) MDR-1 sequences were mixed, each at 1 pmol per peptide (4 pmol peptide in total) and incubated with 1  $\mu\text{g}$  antibody. The same amount of synthetic isotopically-labeled peptides was added to the elution buffer. Capacity was 1.6 pmol LPNK-peptide per  $\mu\text{g}$  antibody calculated by forming the signal ratio of labeled-to non-labeled peptide

**Supplemental Figure 4** Linear range of TXP immunoassays. Peptide dilution series were prepared in low complex buffer. Endogenous 3A4/3A43- (a), 3A5- (b), 3A7- (c), and MDR1-peptides (d) were diluted by spanning concentration levels of four orders of magnitude while the concentration of isotopically-labeled peptides was kept constant. After immunoprecipitation, recoveries of the unlabeled peptides were determined. Data points within a confidence region of  $100\% \pm 20\%$  delineate the functional range of the TXP immunoassays.

**Supplemental Table 1** Target proteins and corresponding signature peptides

**Supplemental Table 2** Mass spectrometry parameters for target peptides

**Supplemental Table 3** Integrated fragment ion signals of endogenous peptide and synthetic standard observed in 10 µg hepatocyte extract

**Supplemental Table 4** Ratios of integrated fragment ion signals. One, five, ten or 25 µg hepatocyte protein extract was digested and spiked with 100 fmol synthetic standard. The samples were either analyzed by TXP-SRM or LC-SRM workflow. Integrated fragment ion signals for all synthetic as well as endogenous peptides were divided by each other.

**Supplemental Table 5** Specificity of the anti-LPNK antibody (on- and off-target binding). We immunoprecipitated peptides from 50 µg digested hepatocyte protein extract and analyzed the peptide pool by nLC high-resolution mass spectrometry. Last four c-terminal amino acids are displayed in bold.

Supplemental Figure 1A

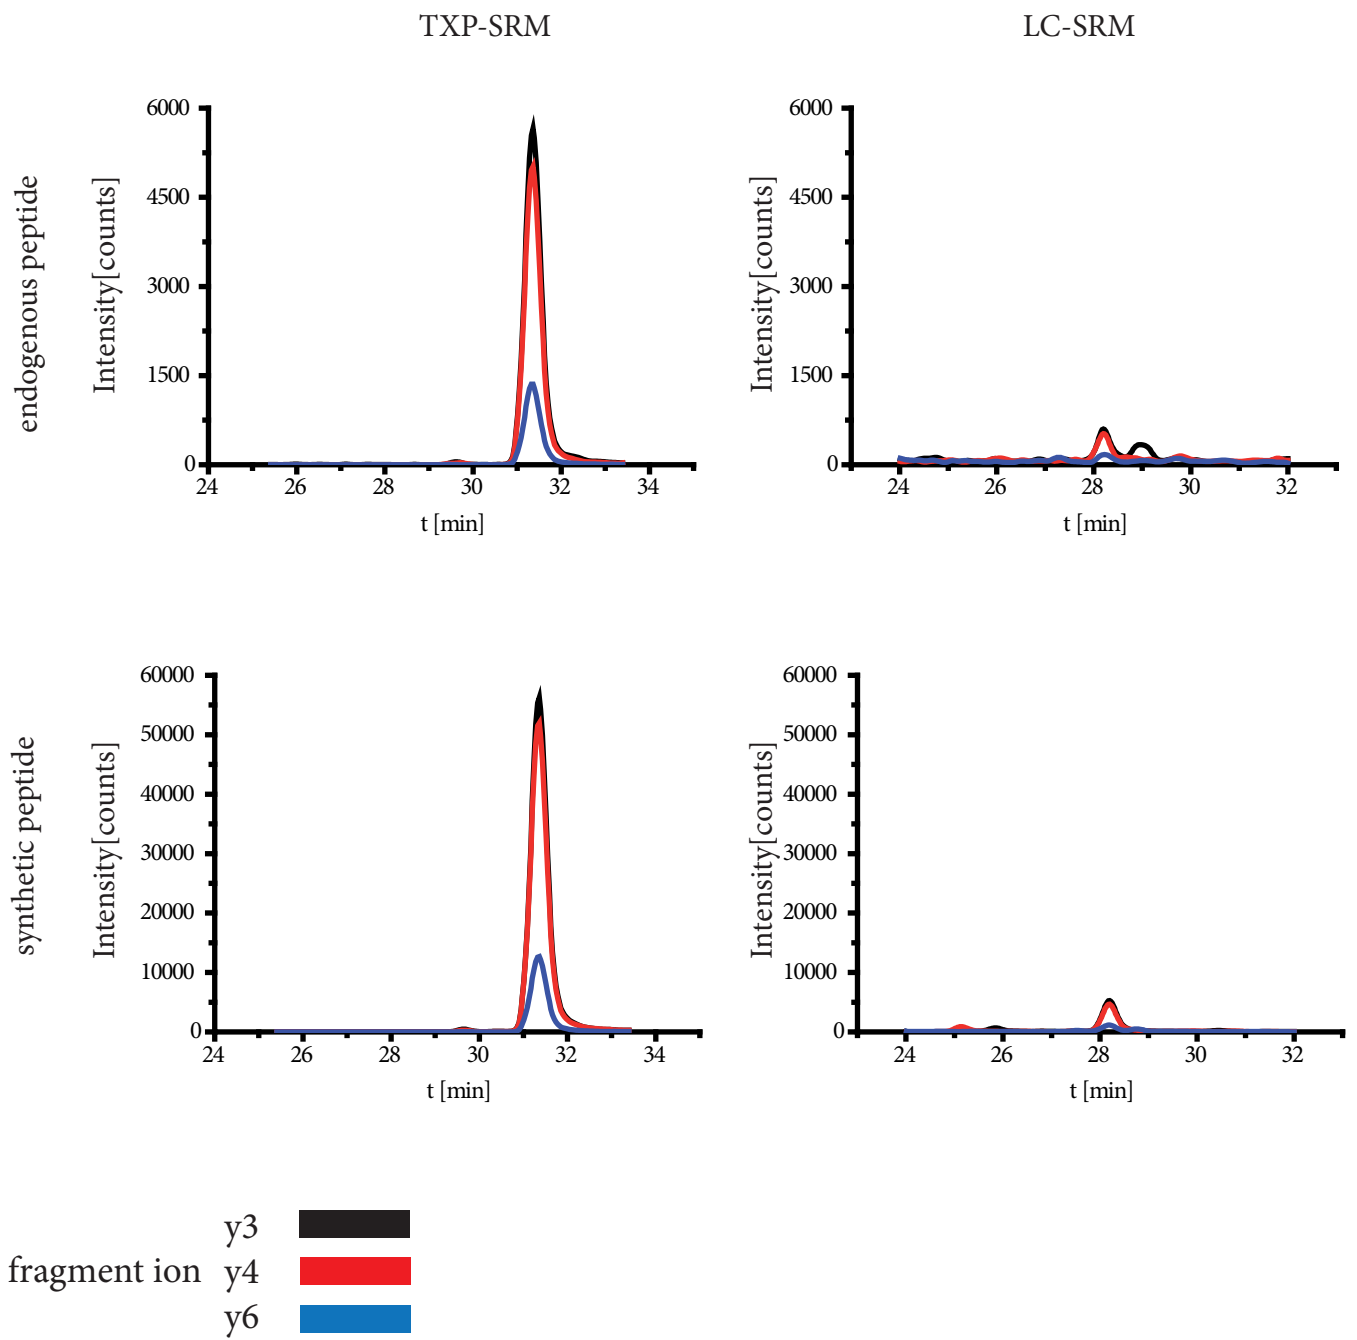

Supplemental Figure 1B

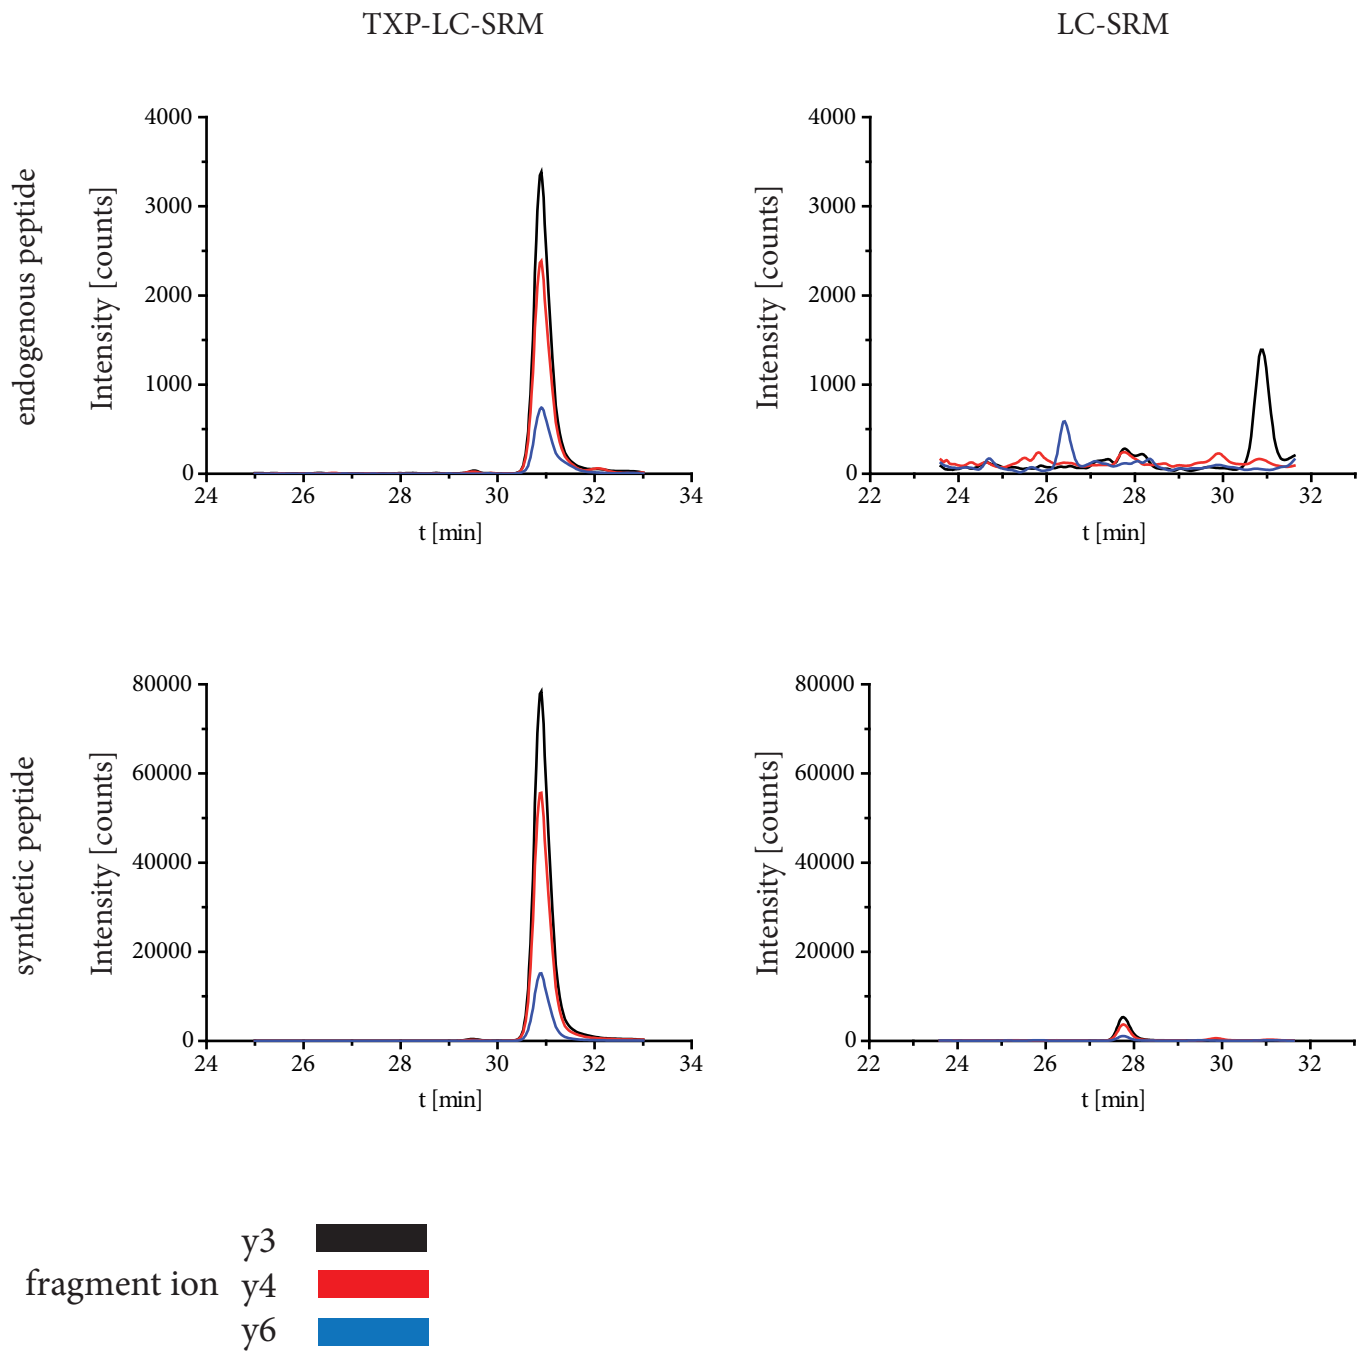

Supplemental Figure 1C

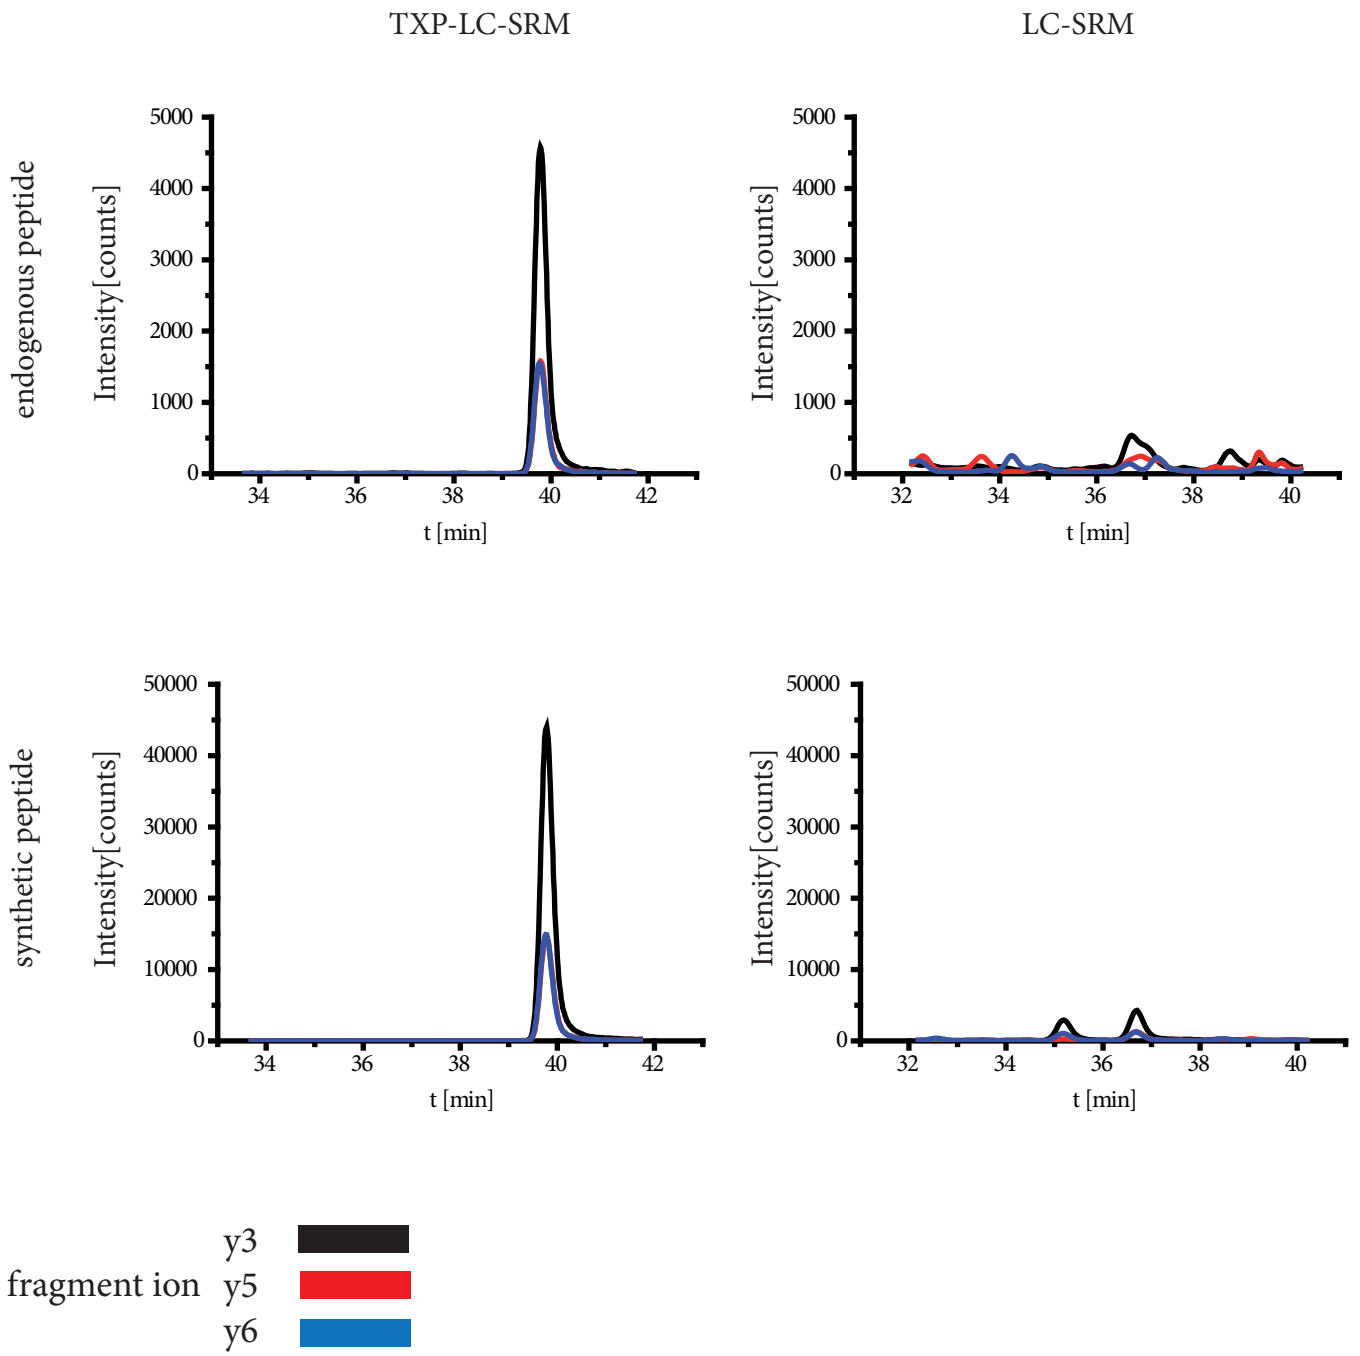

Supplemental Figure 2

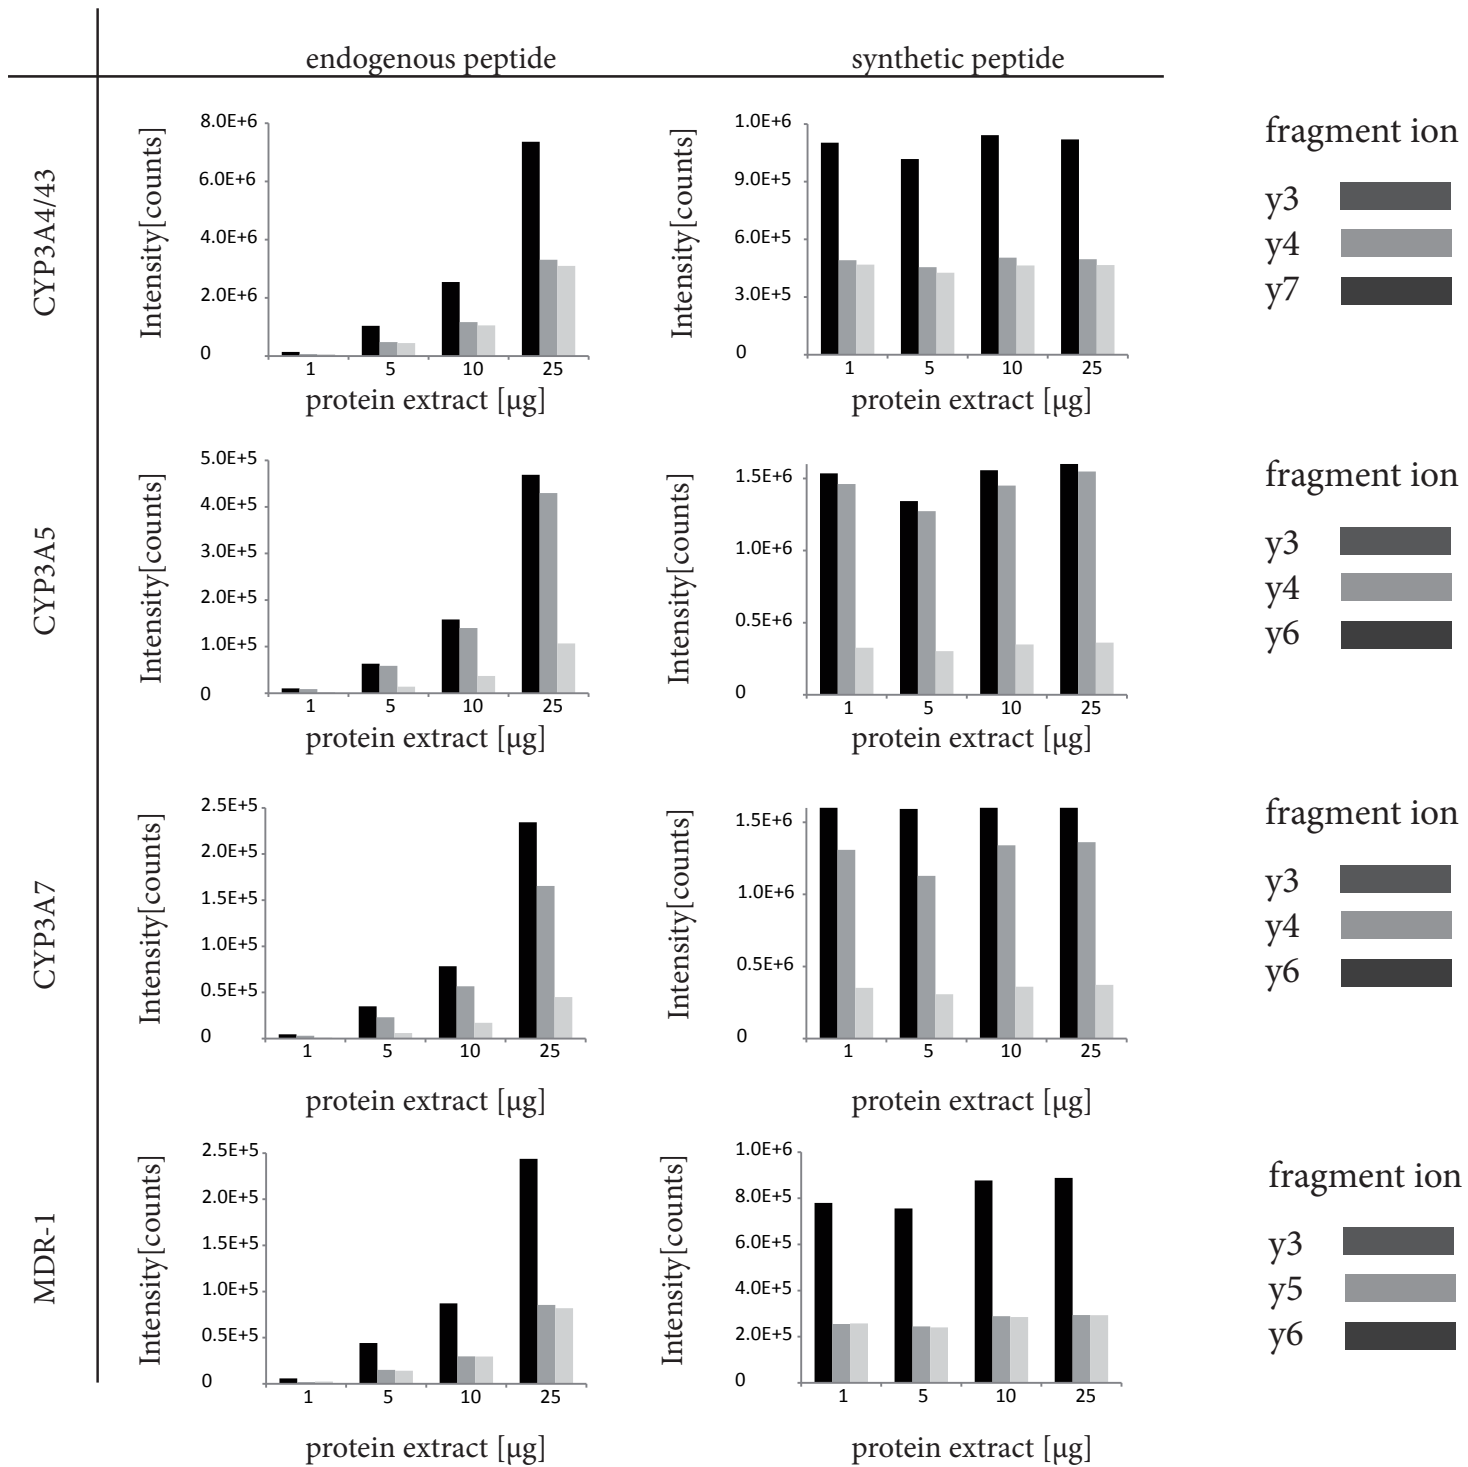

Supplemental Figure 3

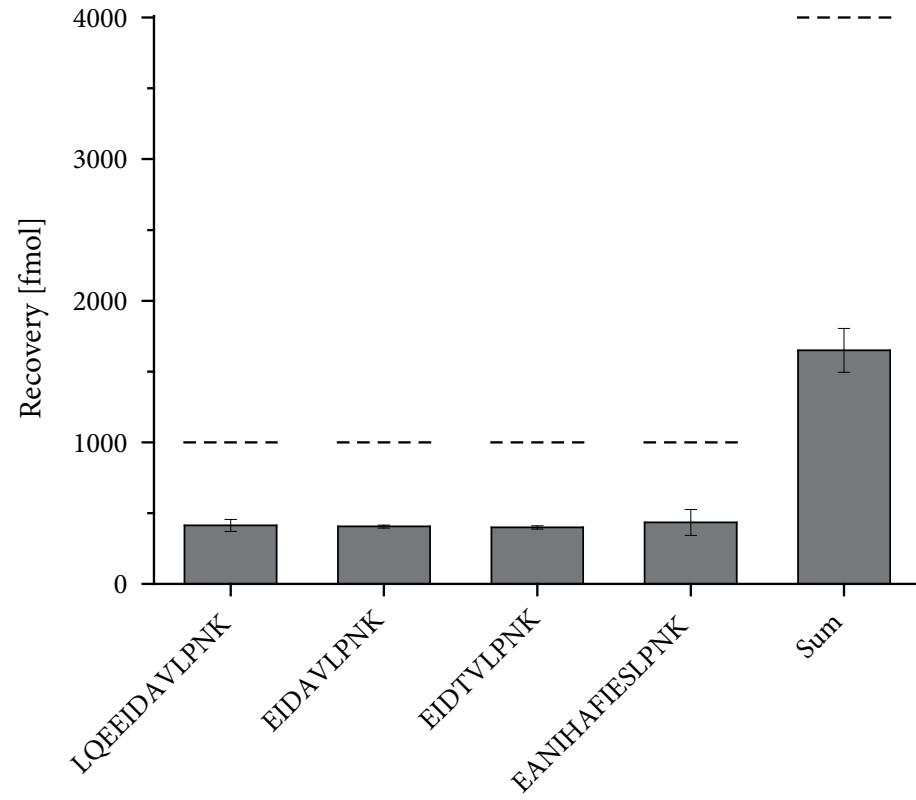



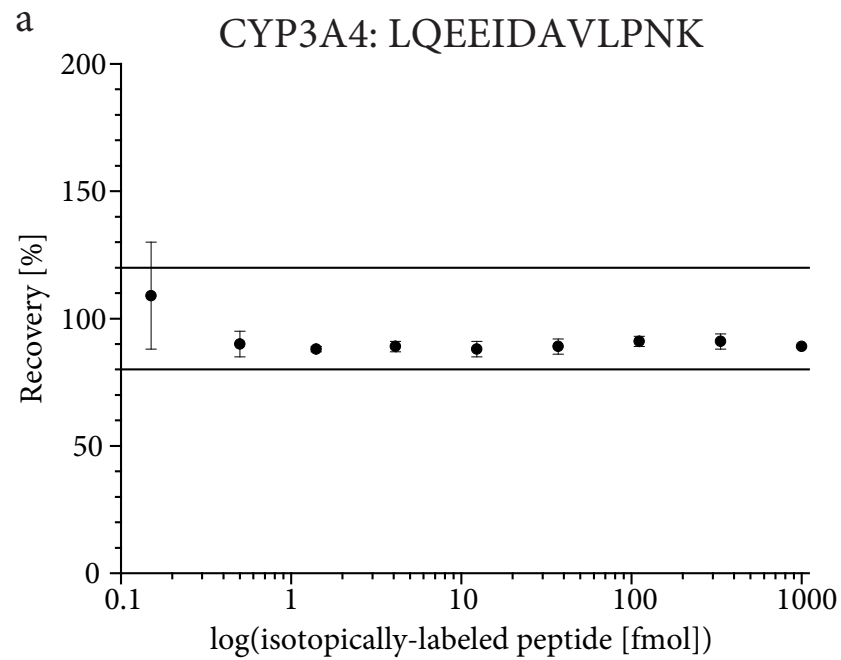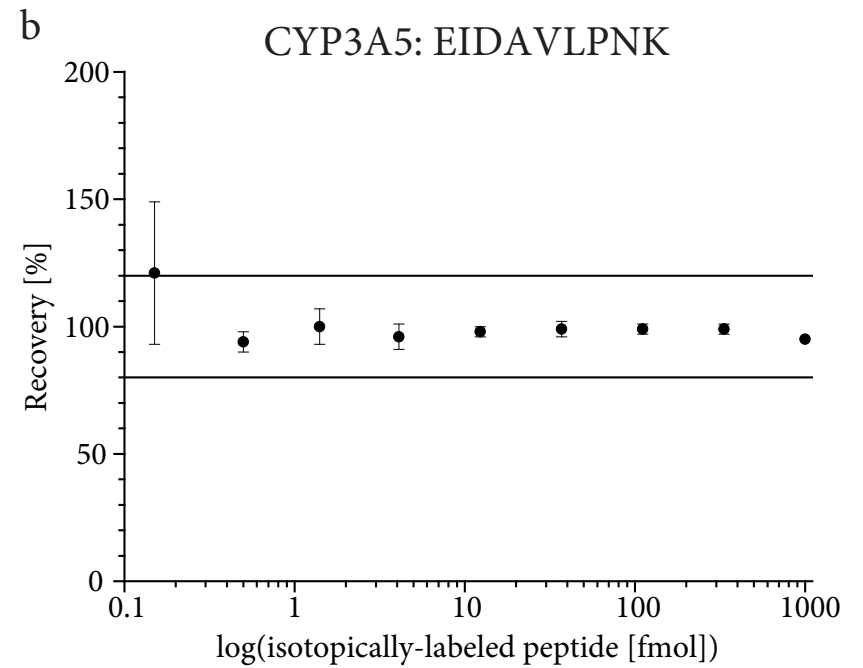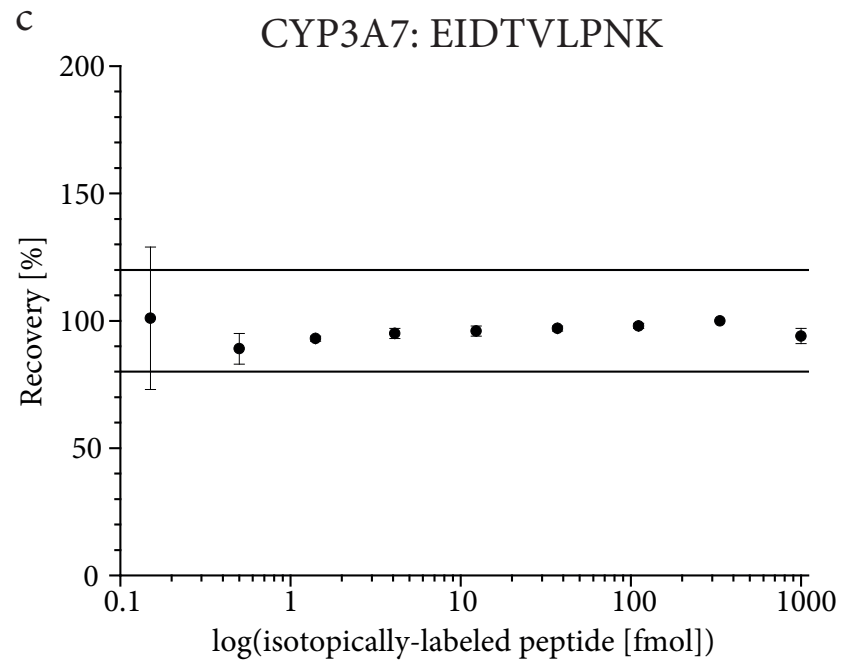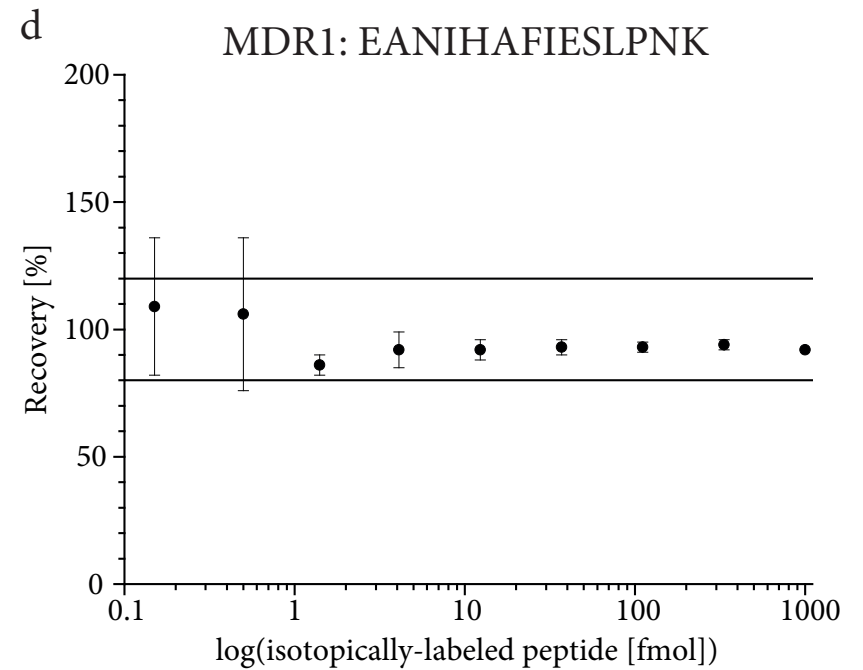

Supplemental Table 1 Target proteins and corresponding signature peptides

| Protein name                   | Gene symbol | Signature peptide/ stable isotope standard | MH+ (mono) |
|--------------------------------|-------------|--------------------------------------------|------------|
| Cytochrome P450 3A4/3A43*      | CYP3A4      | LQEEIDAVLPNK                               | 1369,7     |
|                                |             | LQEEIDAVLPN <b><u>K</u></b>                | 1377,7     |
| Cytochrome P450 3A5            | CYP3A5      | EIDAVLPNK                                  | 999,6      |
|                                |             | EIDAVLPN <b><u>K</u></b>                   | 1007,6     |
| Cytochrome P450 3A7            | CYP3A7      | EIDTVLPNK                                  | 1029,6     |
|                                |             | EIDTVLPN <b><u>K</u></b>                   | 1037,6     |
| Multidrug resistance protein 1 | ABCB1       | EANIHFIESLPNK                              | 1584,9     |
|                                |             | EANIHFIESLPN <b><u>K</u></b>               | 1593,0     |

Bold and underlined amino acid symbols are stable isotopically labelled amino acid residues.

\*Peptide sequence is also present in CYP3A43, but no or only very low expression in hepatocytes

Supplemental Table 2 SRM-MS parameters for target peptides

| Protein name                   | Gene symbol | Accession Number | Peptid sequence | Parent ion m/z | Parent ion charge state | Fragment ion (m/z) | Ion type | Fragment Ion charge state | DP <sup>#</sup> | EP <sup>‡</sup> | CE <sup>\$</sup> | CXP <sup>§</sup> |
|--------------------------------|-------------|------------------|-----------------|----------------|-------------------------|--------------------|----------|---------------------------|-----------------|-----------------|------------------|------------------|
| Cytochrome P450 3A4            | CYP3A4      | P08684           | LQEEIDAVLPNK    | 684.9          | 2+                      | 358.2              | y3       | 1+                        | 70              | 10              | 35               | 10               |
|                                |             |                  |                 |                |                         | 471.3              | y4       | 1+                        | 70              | 10              | 35               | 13               |
|                                |             |                  |                 |                |                         | 756.4              | y7       | 1+                        | 70              | 10              | 35               | 23               |
|                                |             |                  | LQEEIDAVLPNK    | 688.9          | 2+                      | 366.2              | y3       | 1+                        | 70              | 10              | 35               | 10               |
|                                |             |                  |                 |                |                         | 479.3              | y4       | 1+                        | 70              | 10              | 35               | 13               |
|                                |             |                  |                 |                |                         | 764.4              | y7       | 1+                        | 70              | 10              | 35               | 23               |
| Cytochrome P450 3A5            | CYP3A5      | P20815           | EIDAVLPNK       | 499.8          | 2+                      | 358.2              | y3       | 1+                        | 70              | 10              | 25               | 10               |
|                                |             |                  |                 |                |                         | 471.3              | y4       | 1+                        | 70              | 10              | 25               | 13               |
|                                |             |                  |                 |                |                         | 641.4              | y6       | 1+                        | 70              | 10              | 25               | 19               |
|                                |             |                  | EIDAVLPNK       | 503.8          | 2+                      | 366.2              | y3       | 1+                        | 70              | 10              | 25               | 10               |
|                                |             |                  |                 |                |                         | 479.3              | y4       | 1+                        | 70              | 10              | 25               | 13               |
|                                |             |                  |                 |                |                         | 649.4              | y6       | 1+                        | 70              | 10              | 25               | 23               |
| Cytochrome P450 3A7            | CYP3A7      | P24462           | EIDTVLPNK       | 514.80         | 2+                      | 358.2              | y3       | 1+                        | 70              | 10              | 25               | 10               |
|                                |             |                  |                 |                |                         | 471.3              | y4       | 1+                        | 70              | 10              | 25               | 13               |
|                                |             |                  |                 |                |                         | 671.4              | y6       | 1+                        | 70              | 10              | 25               | 20               |
|                                |             |                  | EIDTVLPNK       | 518.80         | 2+                      | 366.2              | y3       | 1+                        | 70              | 10              | 25               | 10               |
|                                |             |                  |                 |                |                         | 479.3              | y4       | 1+                        | 70              | 10              | 25               | 13               |
|                                |             |                  |                 |                |                         | 679.4              | y6       | 1+                        | 70              | 10              | 25               | 21               |
| Multidrug resistance protein 1 | ABCB1       | P08183           | EANIHFIESLPNK   | 528.30         | 3+                      | 358.2              | y3       | 1+                        | 70              | 10              | 30.5             | 10               |
|                                |             |                  |                 |                |                         | 558.3              | y5       | 1+                        | 70              | 10              | 30.5             | 17               |
|                                |             |                  |                 |                |                         | 687.4              | y6       | 1+                        | 70              | 10              | 30.5             | 21               |
|                                |             |                  | EANIHFIESLPNK   | 531.00         | 3+                      | 366.2              | y3       | 1+                        | 70              | 10              | 30.5             | 10               |
|                                |             |                  |                 |                |                         | 566.3              | y5       | 1+                        | 70              | 10              | 30.5             | 17               |
|                                |             |                  |                 |                |                         | 695.4              | y6       | 1+                        | 70              | 10              | 30.5             | 21               |

Bold and underlined amino acid symbols are stable isotopically labelled amino acid residues.

# DP, declustering potential

‡ EP, entrance potential

\$ CE, collision energy

§ CXP, Collision Cell Exit Potential

Supplemental Table 3 Integrated fragment ion signals of endogenous peptide and synthetic standard observed in 10 µg hepatocyte extract

| Protein/peptide         | transition | TXP-SRM                     |                            |                                      | LC-SRM                      |                            |                                      |
|-------------------------|------------|-----------------------------|----------------------------|--------------------------------------|-----------------------------|----------------------------|--------------------------------------|
|                         |            | endogenous peptide [counts] | isotopic standard [counts] | calculated endogenous peptide [fmol] | endogenous peptide [counts] | isotopic standard [counts] | calculated endogenous peptide [fmol] |
| CYP3A4/<br>LQEEIDAVLPNK | y3         | 2.5E+06                     | 1.1E+06                    | 223                                  | 3.0E+05                     | 1.2E+05                    | 251                                  |
|                         | y4         | 1.2E+06                     | 5.1E+05                    |                                      | 1.2E+05                     | 7.1E+04                    |                                      |
|                         | y7         | 1.1E+06                     | 4.6E+05                    |                                      | 1.3E+05                     | 3.3E+04                    |                                      |
| CYP3A5/<br>EIDAVLPNK    | y3         | 1.5E+05                     | 1.6E+06                    | 10                                   | 9.6E+03                     | 1.2E+05                    | 8                                    |
|                         | y4         | 1.4E+05                     | 1.5E+06                    |                                      | 8.0E+03                     | 1.0E+05                    |                                      |
|                         | y6         | 3.7E+04                     | 3.5E+05                    |                                      | 2.7E+03                     | 1.9E+04                    |                                      |
| CYP3A7/<br>EIDTVLPNK    | y3         | 7.8E+04                     | 1.9E+06                    | 4                                    | ND                          | 1.2E+05                    | ND                                   |
|                         | y4         | 5.7E+04                     | 1.3E+06                    |                                      | 3.7E+03                     | 7.5E+04                    |                                      |
|                         | y6         | 1.7E+04                     | 3.6E+05                    |                                      | ND                          | 2.2E+04                    |                                      |
| MDR1/<br>EANIHFIESLPNK  | y3         | 8.7E+04                     | 8.8E+05                    | 10                                   | 1.6E+04                     | 9.2E+04                    | ND                                   |
|                         | y5         | 3.0E+04                     | 2.9E+05                    |                                      | ND                          | 2.8E+04                    |                                      |
|                         | y6         | 3.0E+04                     | 2.9E+05                    |                                      | 2.6E+03                     | 2.7E+04                    |                                      |

Supplemental Table 4 Fragment ion signal observed in 1, 5, 10 and 25 µg hepatocyte extract

|                    |                    | TXP-SRM |       |      |       |       |     |      |        | LC-SRM |      |       |       |      |      |        |     |
|--------------------|--------------------|---------|-------|------|-------|-------|-----|------|--------|--------|------|-------|-------|------|------|--------|-----|
| Endogenous peptide | Protein            | Ratio   | 1 µg  | 5 µg | 10 µg | 25 µg | MW  | stdv | cv [%] | 1 µg   | 5 µg | 10 µg | 25 µg | MW   | stdv | cv [%] |     |
|                    | Endogenous peptide | CYP3A4  | y3/y4 | 2.1  | 2.2   | 2.2   | 2.2 | 2.2  | 0.1    | 2.9    | 2.3  | 2.6   | 2.5   | 2.5  | 2.5  | 0.1    | 4.6 |
| y3/y7              |                    |         | 2.4   | 2.3  | 2.4   | 2.4   | 2.4 | 0.0  | 1.2    | 2.3    | 2.5  | 2.3   | 2.2   | 2.3  | 0.1  | 5.7    |     |
| y4/y7              |                    |         | 1.1   | 1.1  | 1.1   | 1.1   | 1.1 | 0.0  | 2.9    | 1.0    | 1.0  | 0.9   | 0.9   | 0.9  | 0.0  | 5.3    |     |
| CYP3A5             |                    | y3/y4   | 1.2   | 1.1  | 1.1   | 1.1   | 1.1 | 0.0  | 3.8    | 0.9    | 1.0  | 1.2   | 1.1   | 1.1  | 0.1  | 12.2   |     |
|                    |                    | y3/y6   | 4.4   | 4.5  | 4.3   | 4.4   | 4.4 | 0.1  | 2.3    | n.d.   | 3.7  | 3.6   | 2.4   | 3.2  | 0.7  | 22.3   |     |
|                    |                    | y4/y6   | 3.8   | 4.2  | 3.8   | 4.0   | 3.9 | 0.2  | 5.3    | n.d.   | 3.9  | 3.0   | 2.2   | 3.0  | 0.8  | 28.4   |     |
| CYP3A7             |                    | y3/y4   | 1.5   | 1.5  | 1.4   | 1.4   | 1.5 | 0.1  | 4.3    | n.d.   | n.d. | n.d.  | n.d.  | n.d. | n.d. | n.d.   |     |
|                    |                    | y3/y6   | 4.2   | 5.8  | 4.6   | 5.2   | 5.0 | 0.7  | 14.4   | n.d.   | n.d. | n.d.  | n.d.  | n.d. | n.d. | n.d.   |     |
|                    |                    | y4/y6   | 2.8   | 3.8  | 3.3   | 3.7   | 3.4 | 0.4  | 13.1   | n.d.   | n.d. | n.d.  | n.d.  | n.d. | n.d. | n.d.   |     |
| MDR1               |                    | y3/y5   | 3.0   | 2.9  | 2.9   | 2.9   | 2.9 | 0.1  | 2.3    | n.d.   | n.d. | n.d.  | n.d.  | n.d. | n.d. | n.d.   |     |
|                    |                    | y3/Y6   | 2.3   | 3.1  | 2.9   | 3.0   | 2.8 | 0.4  | 13.3   | 2.1    | 8.0  | 6.2   | n.d.  | 5.4  | 3.0  | 55.8   |     |
|                    |                    | y5/y6   | 0.8   | 1.1  | 1.0   | 1.0   | 1.0 | 0.1  | 14.8   | n.d.   | n.d. | n.d.  | n.d.  | n.d. | n.d. | n.d.   |     |
| Synthetic peptide  | Protein            | Ratio   | 1 µg  | 5 µg | 10 µg | 25 µg | MW  | stdv | cv [%] | 1 µg   | 5 µg | 10 µg | 25 µg | MW   | stdv | cv [%] |     |
|                    | CYP3A4             | y3/y4   | 2.2   | 2.2  | 2.3   | 2.3   | 2.2 | 0.0  | 0.5    | 2.3    | 1.8  | 1.7   | 2.5   | 2.1  | 0.4  | 18.9   |     |
|                    |                    | y3/y7   | 2.4   | 2.4  | 2.5   | 2.4   | 2.4 | 0.0  | 1.8    | 2.3    | 3.3  | 3.6   | 3.4   | 3.1  | 0.6  | 18.6   |     |
|                    |                    | y4/y7   | 1.0   | 1.1  | 1.1   | 1.1   | 1.1 | 0.0  | 1.5    | 1.0    | 1.8  | 2.1   | 1.3   | 1.6  | 0.5  | 32.1   |     |
|                    | CYP3A5             | y3/y4   | 1.0   | 1.1  | 1.1   | 1.1   | 1.1 | 0.0  | 0.9    | 1.1    | 1.1  | 1.1   | 1.1   | 1.1  | 0.0  | 1.7    |     |
|                    |                    | y3/y6   | 4.7   | 4.4  | 4.5   | 4.5   | 4.5 | 0.1  | 2.7    | 4.5    | 5.8  | 6.2   | 4.8   | 5.4  | 0.8  | 15.1   |     |
|                    |                    | y4/y6   | 4.5   | 4.2  | 4.2   | 4.3   | 4.3 | 0.1  | 3.4    | 4.1    | 5.3  | 5.6   | 4.2   | 4.8  | 0.7  | 15.5   |     |
|                    | CYP3A7             | y3/y4   | 1.4   | 1.4  | 1.3   | 1.4   | 1.4 | 0.0  | 1.7    | 1.5    | 1.6  | 1.6   | 1.6   | 1.6  | 0.1  | 4.5    |     |
|                    |                    | y3/y6   | 5.1   | 5.2  | 5.2   | 5.1   | 5.2 | 0.0  | 0.8    | 5.5    | 5.8  | 5.3   | 5.7   | 5.6  | 0.2  | 3.8    |     |
|                    |                    | y4/y6   | 3.8   | 3.7  | 3.9   | 3.7   | 3.8 | 0.1  | 2.3    | 3.7    | 3.7  | 3.4   | 3.5   | 3.6  | 0.2  | 5.0    |     |
|                    | MDR1               | y3/y5   | 3.1   | 3.1  | 3.0   | 3.0   | 3.1 | 0.0  | 0.9    | 3.1    | 3.3  | 3.3   | 3.5   | 3.3  | 0.2  | 4.6    |     |
|                    |                    | y3/Y6   | 3.0   | 3.1  | 3.1   | 3.0   | 3.1 | 0.1  | 1.8    | 3.2    | 3.3  | 3.5   | 2.8   | 3.2  | 0.3  | 9.4    |     |
| y5/y6              |                    | 1.0     | 1.0   | 1.0  | 1.0   | 1.0   | 0.0 | 1.3  | 1.0    | 1.0    | 1.1  | 0.8   | 1.0   | 0.1  | 12.2 |        |     |

\*n.d. not determined due to missing values

Supplemental Table 5

| #  | Sequence                             | C-terminus | Replicate 1 |              |         | Replicate 2 |              |         | Replicate 3 |              |         |
|----|--------------------------------------|------------|-------------|--------------|---------|-------------|--------------|---------|-------------|--------------|---------|
|    |                                      |            | PSM         | Mascot Score | Sequest | PSM         | Mascot Score | Sequest | PSM         | Mascot Score | Sequest |
| 1  | AAILPTSIFLTNK                        | LTNK       | 0           |              |         | 1           | 49.23        | 2.16    | 1           | 18.17        |         |
| 2  | AALEALGScLNNK*                       | LNNK       | 1           | 21.14        |         | 1           | 25.97        |         | 1           | 25.43        | 1.77    |
| 3  | AAIYFTDFcPDNLFNK                     | LFNK       | 1           | 32.87        |         | 1           | 61.24        | 2.18    | 1           | 46.77        |         |
| 4  | AISNSHYVLELTLPNIVVTLPNK              | LPNK       | 1           | 36.73        | 1.94    | 1           | 17.26        |         | 0           |              |         |
| 5  | APVLFNK                              | LFNK       | 1           | 16.51        |         | 0           |              |         | 1           | 13.01        |         |
| 6  | AVDcFTAALSVRPNDYLLWNK                | LWNK       | 1           | 16.29        |         | 2           | 14.91        | 2.07    | 1           | 19.57        |         |
| 7  | AVLEALGScLNNK                        | LNNK       | 1           | 18.56        | 2.25    | 1           | 37.9         |         | 1           | 84.09        | 3.01    |
| 8  | AVMVSNILINK                          | LINK       | 1           | 51.78        | 1.89    | 2           | 32.51        |         | 1           | 34.96        | 1.71    |
| 9  | AWITNAWEASAAVVFASDRLQNK              | LQNK       | 2           | 101.74       | 3.70    | 2           | 64.14        | 4.89    | 4           | 96.6         | 5.74    |
| 10 | cIYcGFcQEAcPVDAIVEGPNFEFSTETHEELLYNK | LYNK       | 1           | 45.2         | 4.47    | 1           | 40.32        | 5.28    | 0           |              |         |
| 11 | cLmANSTWGYPFHDGDYLNDEALWNK#          | LWNK       | 1           | 34.07        | 2.75    | 1           | 39.46        | 3.28    | 3           | 48.09        | 2.51    |
| 12 | cTLTSIPQTQALLNK                      | LLNK       | 1           | 17.42        | 1.63    | 0           |              |         | 0           |              |         |
| 13 | cTSNPAEIAMFLEPLDLPNK                 | LPNK       | 1           | 60.09        | 2.54    | 0           |              |         | 1           | 37.2         | 2.29    |
| 14 | DAIILIFANK                           | FANK       | 0           |              |         | 0           |              |         | 1           | 17.31        |         |
| 15 | DATNVGDEGGFAPNILENK                  | LENK       | 4           | 88.86        | 4.78    | 2           | 66.79        | 3.28    | 3           | 102.52       | 5.21    |
| 16 | DAVLLVFANK                           | FANK       | 1           | 14.91        |         | 0           |              |         | 1           | 33.35        |         |
| 17 | DGIILcELINK                          | LINK       | 1           | 49           | 2.10    | 1           | 49.79        | 1.98    | 1           | 46.47        | 2.37    |
| 18 | DNHLVHLPLTLILVNK                     | LVNK       | 1           | 35.67        |         | 1           | 33.89        | 2.33    | 1           | 44.92        | 1.79    |
| 19 | DPENFPFVVLGNK                        | LGNK       | 2           | 57.64        | 3.45    | 3           | 76.13        | 3.41    | 3           | 53.59        | 3.98    |
| 20 | DYFAEQVYWSPLLK                       | LLNK       | 1           | 58.42        | 2.08    | 1           | 43.92        | 1.84    | 1           | 44.77        | 2.00    |
| 21 | EAISDAALEATENEPLNKETEEMcVMLVSNLPNK   | LPNK       | 0           |              |         | 1           | 13.12        |         | 1           | 25.69        |         |
| 22 | EANIHFIESLPNK                        | LPNK       | 2           | 73.58        | 4.53    | 2           | 71.84        | 3.88    | 2           | 77           | 4.41    |
| 23 | EELDSLMTDETIANVPILILGNK              | LGNK       | 1           | 46.26        |         | 3           | 80.57        | 3.01    | 3           | 116.96       | 4.09    |
| 24 | EIIHGIELFNK                          | LFNK       | 1           | 25.68        |         | 0           |              |         | 0           |              |         |
| 25 | ELHINLIPNK                           | IPNK       | 5           | 38.57        | 3.23    | 5           | 32.03        | 3.09    | 5           | 33.38        | 3.21    |
| 26 | ETEEMcVMLVSNLPNK                     | LPNK       | 1           | 40.56        |         | 0           |              |         | 1           | 31.38        |         |
| 27 | EVQMHSFPLQFTLHcALLANK                | LANK       | 1           | 30.95        |         | 2           | 42.29        | 2.19    | 1           | 48.74        | 3.36    |
| 28 | EVYQGSEVEcTVSSLLPGK                  | LPGK       | 0           | 43.22        | 2.36    | 1           | 16.75        |         | 0           |              |         |

| #  | Sequence                        | C-terminus | Replicate 1 |              |         | Replicate 2 |              |         | Replicate 3 |              |         |
|----|---------------------------------|------------|-------------|--------------|---------|-------------|--------------|---------|-------------|--------------|---------|
|    |                                 |            | PSM         | Mascot Score | Sequest | PSM         | Mascot Score | Sequest | PSM         | Mascot Score | Sequest |
| 29 | FAHTNVELSVNEYDDNGEGIILFRPSHLTNK | LTNK       | 3           |              |         | 3           | 64.41        | 5.92    | 3           | 45.46        | 6.36    |
| 30 | FAVFGLGNK                       | LGNK       | 1           | 42.72        | 1.88    | 0           |              |         | 1           | 17.01        | 1.56    |
| 31 | FAWVEADGVNcIMGVLSNK             | LSNK       | 0           |              |         | 1           | 17.85        |         | 0           |              |         |
| 32 | FMQTFVLAPEGSVPNK                | VPNK       | 0           |              |         | 0           |              |         | 1           | 17.44        |         |
| 33 | FNVLHWHIVDDQSFYQSITFPELSNK      | LSNK       | 3           | 56.53        | 4.33    | 2           | 67.83        | 5.21    | 3           | 75.01        | 5.73    |
| 34 | FRSETITEEELVGLMNK               | LMNK       | 2           | 36.17        |         | 1           | 52.89        | 3.15    | 3           | 35.81        |         |
| 35 | GcQLTITFSVPNK                   | VPNK       | 2           | 90.58        | 3.42    | 2           | 90.71        | 3.26    | 2           | 85.23        | 4.00    |
| 36 | GLTVQQWDALYTDLPNR               | LPNR       | 1           | 41.74        |         | 0           |              |         | 1           | 80.34        | 2.94    |
| 37 | GMEELIPLVNK                     | LVNK       | 1           | 29.29        | 1.59    | 0           |              |         | 1           | 22.04        |         |
| 38 | GTSIVVPEPLHFLLPK                | LPGK       | 1           | 14.73        |         | 1           | 23.11        |         | 0           |              |         |
| 39 | GTVIIIANHGDRIDIPPGAVLENK        | LENK       | 3           | 22.76        |         | 8           | 31.8         | 3.02    | 7           | 32.34        | 3.98    |
| 40 | HQAQIDHYLGLANK                  | LANK       | 1           | 73.4         | 4.14    | 1           | 66.11        | 2.26    | 1           | 78.4         | 4.38    |
| 41 | HTEVPTGTcPVDPFQAQWAALENK        | LENK       | 0           |              |         | 0           |              |         | 1           | 40.64        | 1.55    |
| 42 | HVDLLINK                        | LINK       | 1           |              | 1.89    | 0           |              |         | 0           |              |         |
| 43 | IDIPPGAVLENK                    | LENK       | 8           | 43.99        | 2.46    | 7           | 34.11        |         | 6           | 36.45        | 1.84    |
| 44 | IEDLGAAMEEALILDNK               | LDNK       | 0           |              |         | 1           | 18.66        | 1.37    | 0           |              |         |
| 45 | ILPTLEAVAALGNK                  | LGNK       | 0           |              |         | 0           |              |         | 1           | 66.56        | 2.46    |
| 46 | INEIVYFLPFcHSELIQLVNK           | LVNK       | 1           | 19.22        |         | 2           | 26.83        | 2.27    | 2           | 40.73        | 2.16    |
| 47 | IQDLPPVDLSLVNK                  | LVNK       | 0           |              |         | 0           |              |         | 1           | 17.56        |         |
| 48 | KIEDLGAAMEEALILDNK              | LDNK       | 2           | 30.81        |         | 2           | 59.1         | 1.88    | 2           | 52.38        | 1.81    |
| 49 | KPPTFGDASVIALELLNSGYEFDEGSIIFNK | IFNK       | 1           | 31.17        |         | 1           | 53.86        | 2.38    | 2           | 63.98        | 4.40    |
| 50 | LDFLRPYTVPNK                    | VPNK       | 3           | 23.96        | 3.27    | 3           | 19.7         | 2.80    | 1           | 29.24        | 3.34    |
| 51 | LKQDPYLVNFFLENK                 | LENK       | 0           |              |         | 1           | 36.62        | 1.94    | 1           | 22.8         |         |
| 52 | LLELLWNK                        | LWNK       | 2           | 31.38        | 1.91    | 1           | 20.43        |         | 1           | 21.87        |         |
| 53 | LLLFLSTELQASQILQNK              | LQNK       | 1           | 21.15        |         | 1           | 29.91        |         | 1           | 43.31        | 1.55    |
| 54 | LNLAFFVANLQNK                   | LNQNK      | 1           | 55.08        |         | 2           | 79.42        | 3.87    | 2           | 79.14        | 3.37    |
| 55 | LQEEIDAVLPNK                    | LPNK       | 3           | 78.27        | 4.02    | 2           | 74.79        | 3.64    | 2           | 81.15        | 3.87    |
| 56 | LQFDYGVYLLNK                    | LLNK       | 0           |              |         | 0           |              |         | 1           | 19.96        |         |
| 57 | LTLPNGEVPCLLLANK                | LANK       | 1           | 31.25        | 1.97    | 1           | 48.11        | 2.42    | 2           | 39.12        | 2.29    |

| #  | Sequence                                  | C-terminus | Replicate 1 |              |         | Replicate 2 |              |         | Replicate 3 |              |         |
|----|-------------------------------------------|------------|-------------|--------------|---------|-------------|--------------|---------|-------------|--------------|---------|
|    |                                           |            | PSM         | Mascot Score | Sequest | PSM         | Mascot Score | Sequest | PSM         | Mascot Score | Sequest |
| 58 | LTVPDDIAANcIYLNIPNK                       | IPNK       | 15          | 95.57        | 5.09    | 14          | 101.24       | 5.36    | 14          | 89.33        | 5.33    |
| 59 | LVNLQHLDLLNKK                             | LNNK       | 1           | 16.51        |         | 0           |              |         | 1           | 27.74        |         |
| 60 | LYQYPNFAGPHAALANK                         | LANK       | 2           | 32.71        | 2.45    | 0           |              |         | 0           |              |         |
| 61 | MASIYSEEGNIEHAFILYNK                      | LYNK       | 2           | 33.25        | 1.88    | 2           | 63.26        | 2.43    | 0           |              |         |
| 62 | MLSLAEQQLVDcAQDFNNHGcQGGLPSQAFEYILY<br>NK | LYNK       | 5           | 41.7         | 5.89    | 4           | 46.68        | 7.66    | 4           | 42.97        | 8.09    |
| 63 | MVLSVFSPYWLINK                            | LINK       | 0           |              |         | 0           |              |         | 1           | 13.66        |         |
| 64 | NELHNLLDKPQLQGIPVLVLGK                    | LGK        | 1           | 63.56        | 2.08    | 3           | 48.97        | 2.66    | 3           | 71.37        | 4.28    |
| 65 | NFHVFYQLLSGASELLNK                        | LLNK       | 3           | 67.03        | 3.59    | 2           | 80.97        | 4.78    | 5           | 49.78        | 3.93    |
| 66 | NLSLSGHVGFDSLDPQLVNK                      | LVNK       | 0           |              |         | 1           | 25           |         | 0           |              |         |
| 67 | NSSSGVSPLYSPVSFcGIPVGVLQNK                | LQNK       | 1           | 32.26        |         | 1           | 16.96        |         | 0           |              |         |
| 68 | QAGLYSISLPNK                              | LPNK       | 1           | 46.86        | 2.63    | 0           |              |         | 0           |              |         |
| 69 | QILLGPNTGLSGGMPGALPSLPGK                  | LPGK       | 0           |              |         | 0           |              |         | 1           | 19.47        |         |
| 70 | QSDVMIVAGTLTNK                            | LTNK       | 1           | 57.63        | 1.95    | 0           |              |         | 1           | 28.17        |         |
| 71 | RAVMVSNILLINK                             | LINK       | 1           | 31.65        | 1.57    | 1           | 35.64        |         | 2           | 34.02        | 2.00    |
| 72 | SEEELLVIFNK                               | IFNK       | 1           | 40           | 1.52    | 1           | 40.65        |         | 1           | 37.36        | 1.60    |
| 73 | SETITEEELVGLMNK                           | LMNK       | 5           | 121.33       | 4.59    | 6           | 121.35       | 4.74    | 9           | 121.34       | 4.57    |
| 74 | SGFWTIWLWVK                               | LWVK       | 0           |              |         | 0           |              |         | 1           | 31.69        |         |
| 75 | SIQETLGESGSLLPNK                          | LPNK       | 2           | 77.16        | 3.32    | 0           |              |         | 1           | 91.45        | 3.77    |
| 76 | SLDWQIDVDLLNK                             | LLNK       | 0           |              |         | 1           | 66.54        | 1.96    | 1           | 24.35        | 2.21    |
| 77 | SLIEVYMRPLSNK                             | LSNK       | 1           | 20.78        |         | 0           |              |         | 0           |              |         |
| 78 | SPPILPPHLLQVILNK                          | ILNK       | 0           |              |         | 0           |              |         | 1           | 17.68        |         |
| 79 | SQEFYELLNK                                | LLNK       | 0           |              |         | 0           |              |         | 1           | 21.37        |         |
| 80 | TAGWNIPMGLLYNK                            | LYNK       | 15          | 56.44        | 4.50    | 19          | 53.71        | 4.55    | 21          | 63.76        | 4.53    |
| 81 | TLAFTSVDLTNK                              | LTNK       | 0           |              |         | 0           |              |         | 1           | 14.48        |         |
| 82 | TLVLLMGKEGVHGGLINK                        | LINK       | 0           |              |         | 0           |              |         | 1           | 21.08        |         |
| 83 | TQHGVLSQQFVELINK                          | LINK       | 1           | 16.64        |         | 0           |              |         | 0           |              |         |
| 84 | TSGTLISFIYPAQNPELLNK                      | LLNK       | 7           | 87.47        | 5.78    | 9           | 78.37        | 6.07    | 10          | 70.46        | 5.93    |
| 85 | TVGEIMWGYKDPLVNLINK                       | LINK       | 1           | 20.92        |         | 0           |              |         | 1           | 20.72        |         |



| #   | Sequence                          | C-terminus | Replicate 1 |              |         | Replicate 2 |              |         | Replicate 3 |              |         |
|-----|-----------------------------------|------------|-------------|--------------|---------|-------------|--------------|---------|-------------|--------------|---------|
|     |                                   |            | PSM         | Mascot Score | Sequest | PSM         | Mascot Score | Sequest | PSM         | Mascot Score | Sequest |
| 86  | VAcITEQVLTLVNK                    | LVNK       | 3           | 83.5         | 3.87    | 3           | 71.11        | 3.57    | 6           | 63.62        | 3.90    |
| 87  | VASPGSTIDTAPLSSVDSLK              | LINK       | 0           |              |         | 0           |              |         | 1           | 16.14        |         |
| 88  | VDGLLTccSVLINK                    | LINK       | 1           | 61.19        | 3.61    | 3           | 55.93        | 2.98    | 3           | 53.94        | 3.39    |
| 89  | VELNALMTDETISNVPILILGNK           | LGNK       | 1           | 57.78        | 2.00    | 2           | 104.02       | 4.01    | 2           | 86.3         | 3.44    |
| 90  | VHLPNGSPIPAVLLANK                 | LANK       | 2           | 37.82        | 1.84    | 3           | 30.75        | 1.77    | 2           | 26.22        | 1.65    |
| 91  | VILNAATLTGAmDVALGSGATGVFTNSSWLWNK | LWNK       | 6           | 116.57       | 6.37    | 5           | 102.88       | 5.43    | 4           | 109.58       | 4.95    |
| 92  | VKYEETVfyGLQYILNK                 | ILNK       | 0           |              |         | 1           | 39.97        |         | 0           |              |         |
| 93  | VNAMTFTFDNVLP GK                  | LPGK       | 2           | 43.47        | 1.53    | 1           | 41           |         | 1           | 50.51        | 2.58    |
| 94  | VNVNLLIYLLNK                      | LLNK       | 2           | 79.31        | 3.40    | 2           | 78.94        | 3.57    | 2           | 73.94        | 3.31    |
| 95  | VSGQGRDQALNLLNK                   | LLNK       | 0           |              |         | 0           |              |         | 2           | 15.88        |         |
| 96  | VVTSEALcGVPVLVLANK                | LANK       | 2           | 92.5         | 4.21    | 3           | 50.16        | 2.80    | 3           | 63.28        | 3.24    |
| 97  | WYLFMGNEVDVHAAFFHGQALTNK          | LTNK       | 0           |              |         | 1           | 17.59        |         | 2           | 25.64        | 1.91    |
| 98  | YAQVKPDGTYVKPLSNK                 | LSNK       | 3           | 37.01        | 1.94    | 1           | 15.78        |         | 1           | 16.08        |         |
| 99  | YDGIILPGK                         | LPGK       | 1           | 27.42        |         | 1           | 13.55        |         | 1           | 16.58        |         |
| 100 | YDIDLPNK                          | LPNK       | 1           |              | 1.55    | 0           |              |         | 0           |              |         |
| 101 | YDKLTVPDDIAANcIYLNIPNK            | IPNK       | 3           | 69.91        | 5.07    | 3           | 73.08        | 5.73    | 5           | 73.59        | 5.45    |
| 102 | YEDFVVDGFNVLYNK                   | LYNK       | 2           | 61.53        | 3.89    | 3           | 47.38        | 2.85    | 3           | 50.36        | 3.31    |
| 103 | YFDLGLPNR                         | LPNR       | 3           | 41.16        | 2.28    | 2           | 34.07        | 2.22    | 4           | 43.35        | 1.92    |
| 104 | YFTFPFEEIDFSMEESMIHLPNK           | LPNK       | 15          | 68.23        | 6.78    | 15          | 70.76        | 7.18    | 17          | 73.75        | 6.33    |
| 105 | YPDFAAGWALSIPLVNK                 | LVNK       | 2           | 19.46        |         | 1           | 22.07        |         | 1           | 14.12        |         |

\*c carbamidomethylated cysteine # m oxidized and non-oxidized methionine
